# Supplementary material for: Protocol: a beginner’s guide to the analysis of RNA-directed DNA methylation in plants
Source: PubMed Central journal article supplement (PMC4065543; doi:10.1186/1746-4811-10-18), 2014-06-14

**Figure S1**

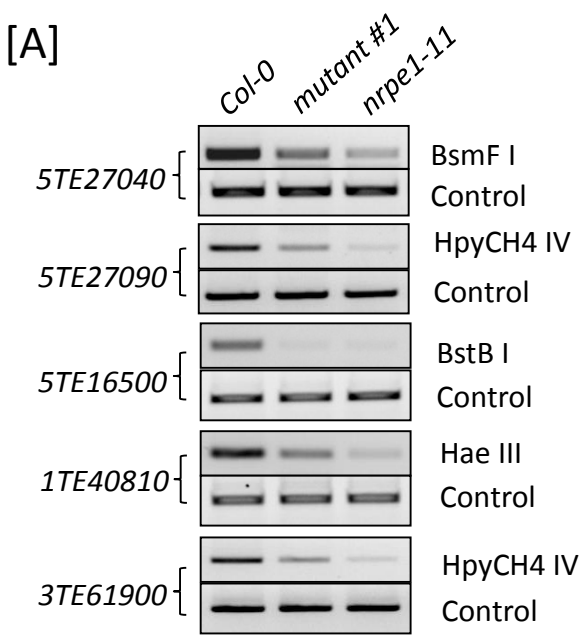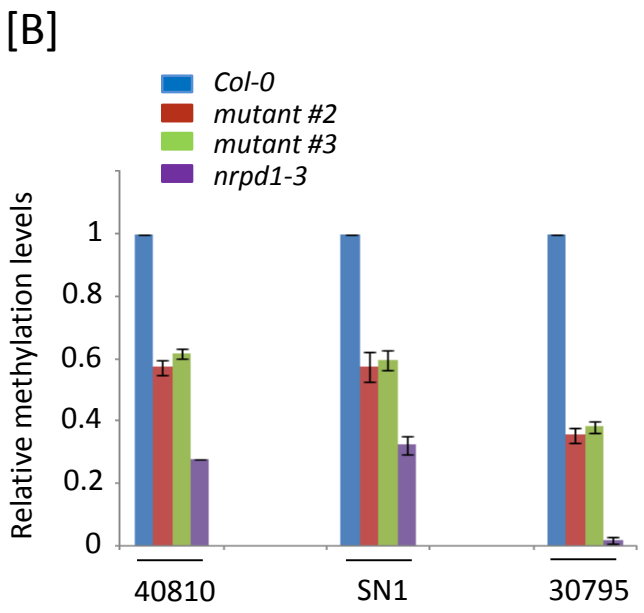

**Figure S2**

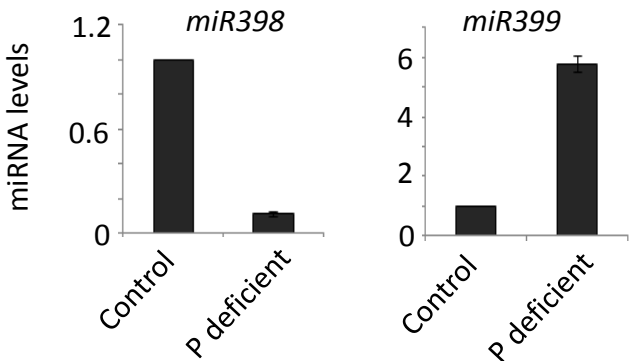

**Figure S3**

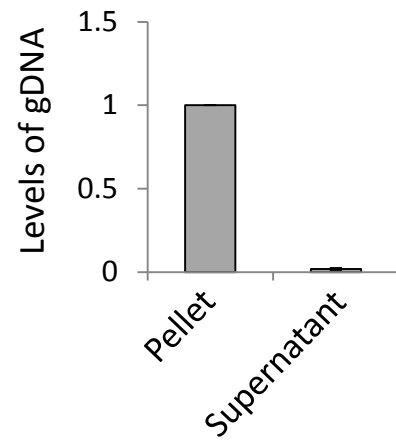

Supplement: 1746-4811-10-18-S1.pdf [file 1746-4811-10-18-S1.pdf]
